# Supplementary material
Source: HighWire-hosted journal article supplement (https://gpsych.bmj.com/content/31/1/e000004)
Supplement: inline-supplementary-material-2 [file inline-supplementary-material-2.docx]

**应对方式在中国临床医生工作家庭冲突与职业倦怠中的中介作用**

陈伶，刘军军，杨海龙，马辉，王慧，黄云，成灏，唐佃珍，刘淼，罗厚员，曲海涛，沈迪文，张宁

**背景**：职业倦怠水平不仅对临床医生自身，同时也对患者的身体健康产生负面影响。识别临床医生职业倦怠的风险因素对于改善他们的健康水平和提高医疗服务质量至关重要。本研究旨在探讨中国医生工作家庭冲突与职业倦怠之间的关系以及应对方式二者中的中介作用。

**方法：**共纳入2530例中国临床医生，采用中文版Maslach职业倦怠问卷评估职业倦怠水平，工作家庭冲突问卷评估工作家庭冲突，简易应对方式问卷评估应对方式。采用相关分析探讨职业倦怠、工作家庭冲突和应对方式评分之间的相关性，分层线性回归模型考察应对方式在工作家庭冲突与职业倦怠中的中介作用。

**结果：**临床医生工作影响家庭冲突与情感耗竭正相关（r = 0.514，p <0.001），与个人成就感降低负相关（r = -0.149，p <0.001）。家庭影响工作冲突与职业倦怠三个维度均呈正相关（r = 0.213,0.504,0.088，p <0.001）。应对方式在工作家庭冲突与职业倦怠之间起部分或完全中介作用。

**结论：**工作家庭冲突与职业倦怠关系密切，应对方式在二者中起中介作用。积极应对方式有助于缓解或消除职业倦怠。

**关键词：**职业倦怠，工作家庭冲突，应对方式，中文版Maslach职业倦怠问卷，中国临床医生
