# Supplementary material
Source: HighWire-hosted journal article supplement (https://gpsych.bmj.com/content/31/1/e000004)

**Flowchart of the study**


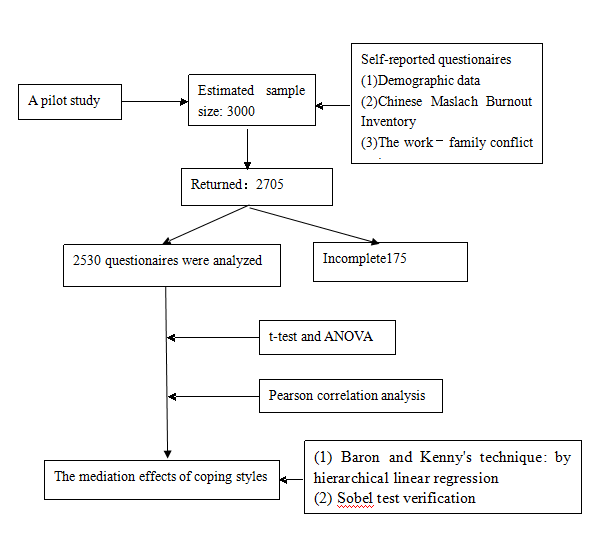

Supplement: inline-supplementary-material-1 [file inline-supplementary-material-1.docx]
